# Supplementary material for: Phosphonates as ligands in Co–Cr heterometallic clusters
Source: Royal Society of Chemistry journal article supplement (doi:10.1039/c0dt00017e), 2010-01-01
Supplement: c0dt00017e.pdf [file c0dt00017e.pdf]

Supporting Information for

## Phosphonates As Ligands In Co-Cr Heterometallic Clusters

<sup>5</sup> Yan-Zhen Zheng, Barbara A. Breeze, Grigore A. Timco and Richard E. P. Winpenny\*

*School of Chemistry*

*The University of Manchester*

*Oxford Road. M13 9PL, Manchester (UK)*

*Fax: (+44)161-275-4616*

<sup>10</sup> *E-mail: richard.winpenny@manchester.ac.uk*

Table S1 Bond distances M-O donor ligand for 3.

| Atoms       | Distance / Å | Atoms       | Distance / Å |
|-------------|--------------|-------------|--------------|
| Co(1)-O(1)  | 1.956(3)     | Co(4)-O(20) | 2.036(4)     |
| Co(1)-O(3)  | 1.984(3)     | Co(4)-O(22) | 2.075(4)     |
| Co(1)-O(5)  | 1.992(3)     | Co(4)-O(24) | 2.156(3)     |
| Co(1)-O(7)  | 1.998(3)     | Co(4)-O(6)  | 2.670(3)     |
| Co(2)-O(11) | 2.028(3)     | Cr(1)-O(2)  | 1.945(3)     |
| Co(2)-O(9)  | 2.031(4)     | Cr(1)-O(1)  | 1.947(3)     |
| Co(2)-O(1)  | 2.034(3)     | Cr(1)-O(15) | 1.988(3)     |
| Co(2)-O(4)  | 2.069(3)     | Cr(1)-O(10) | 2.003(3)     |
| Co(2)-O(23) | 2.187(3)     | Cr(1)-O(6)  | 2.003(3)     |
| Co(2)-O(13) | 2.472(4)     | Cr(1)-O(13) | 2.017(3)     |
| Co(3)-O(2)  | 1.958(3)     | Cr(2)-O(1)  | 1.943(3)     |
| Co(3)-O(14) | 1.994(3)     | Cr(2)-O(2)  | 1.944(3)     |
| Co(3)-O(21) | 1.997(3)     | Cr(2)-O(12) | 1.989(3)     |
| Co(3)-O(18) | 2.009(3)     | Cr(2)-O(8)  | 1.994(3)     |
| Co(4)-O(2)  | 2.009(3)     | Cr(2)-O(19) | 1.997(3)     |
| Co(4)-O(16) | 2.022(4)     | Cr(2)-O(17) | 2.005(3)     |

<sup>15</sup>

Table S2 Bond distances M-O donor ligand for 4.

| Atoms         | Distance / Å | Atoms         | Distance / Å |
|---------------|--------------|---------------|--------------|
| Cr(1) – O(1)  | 2.043(4)     | Co(3) – O(2)  | 2.141(3)     |
| Cr(1) – O(20) | 1.956(4)     | Co(3) – O(10) | 2.118(3)     |
| Cr(1) – O(40) | 1.982(4)     | Co(3) – O(11) | 2.082(3)     |
| Cr(1) – O(50) | 1.982(4)     | Co(3) – O(30) | 2.272(4)     |
| Cr(1) – O(70) | 1.995(5)     | Co(3) – O(61) | 2.033(4)     |
| Cr(1) – O(80) | 2.003(5)     | Co(3) – O(90) | 2.022(4)     |
| Cr(2) – O(1)  | 2.032(4)     | Co(4) – O(1)  | 2.105(4)     |
| Cr(2) – O(2)  | 1.994(3)     | Co(4) – O(2)  | 2.153(3)     |
| Cr(2) – O(12) | 1.939(4)     | Co(4) – O(10) | 2.168(3)     |

---

|               |          |               |          |
|---------------|----------|---------------|----------|
| Cr(2) – O(20) | 1.953(4) | Co(4) – O(11) | 2.065(3) |
| Cr(2) – O(41) | 1.988(4) | Co(4) – O(30) | 2.184(4) |
| Cr(2) – O(60) | 1.945(4) | Co(4) – O(51) | 2.046(4) |

*Table S3 Bond distances M-O donor ligand for 5.*

| Atoms          | Distance / Å | Atoms           | Distance / Å |
|----------------|--------------|-----------------|--------------|
| Co(1) – O(111) | 2.060(3)     | Co(7) – O(8)    | 1.992(3)     |
| Co(1) – O(121) | 2.062(3)     | Co(7) – O(15)   | 2.102(4)     |
| Co(1) – O(131) | 2.20(2)      | Co(7) – O(122)  | 2.154(3)     |
| Co(1) – O(134) | 2.13(2)      | Co(7) – O(131)  | 2.03(2)      |
| Co(1) – O(132) | 2.25(2)      | Co(7) – O(134)  | 2.29(2)      |
| Co(1) – O(135) | 2.08(2)      | Co(7) – O(142)  | 2.27(2)      |
| Co(1) – O(141) | 2.12(4)      | Co(7) – O(145)  | 2.06(3)      |
| Co(1) – O(144) | 2.22(5)      | Co(7) – O(190)  | 2.047(4)     |
| Co(1) – O(142) | 2.14(3)      | Cr(8) – O(2)    | 2.001(4)     |
| Co(1) – O(145) | 2.16(4)      | Cr(8) – O(8)    | 1.940(4)     |
| Co(2) – O(111) | 2.077(3)     | Cr(8) – O(9)    | 1.968(4)     |
| Co(2) – O(121) | 2.047(3)     | Cr(8) – O(10)   | 1.927(4)     |
| Co(2) – O(151) | 2.170(11)    | Cr(8) – O(122)  | 2.044(3)     |
| Co(1) – O(154) | 2.13(3)      | Cr(8) – O(191)  | 1.968(4)     |
| Co(2) – O(152) | 2.215(11)    | Cr(9) – O(2)    | 1.994(3)     |
| Co(2) – O(155) | 2.05(3)      | Cr(9) – O(9)    | 1.973(3)     |
| Co(2) – O(161) | 2.07(5)      | Cr(9) – O(11)   | 1.931(3)     |
| Co(2) – O(164) | 2.20(2)      | Cr(9) – O(12)   | 1.929(3)     |
| Co(2) – O(162) | 2.22(9)      | Cr(9) – O(123)  | 2.038(3)     |
| Co(2) – O(165) | 2.15(5)      | Cr(9) – O(200)  | 1.976(3)     |
| Co(3) – O(3)   | 1.981(3)     | Co(10) – O(11)  | 1.976(3)     |
| Co(3) – O(13)  | 2.110(4)     | Co(10) – O(16)  | 2.109(3)     |
| Co(3) – O(112) | 2.156(3)     | Co(10) – O(123) | 2.161(3)     |
| Co(3) – O(151) | 2.037(10)    | Co(10) – O(162) | 2.25(9)      |
| Co(3) – O(154) | 2.33(2)      | Co(10) – O(165) | 2.20(5)      |
| Co(3) – O(161) | 2.37(5)      | Co(10) – O(152) | 2.047(10)    |
| Co(3) – O(164) | 2.18(3)      | Co(10) – O(155) | 2.32(3)      |
| Co(3) – O(170) | 2.055(3)     | Co(10) – O(201) | 2.052(3)     |
| Cr(4) – O(1)   | 1.994(3)     | Co(11) – O(1)   | 2.240(3)     |
| Cr(4) – O(3)   | 1.935(3)     | Co(11) – O(5)   | 1.987(4)     |
| Cr(4) – O(4)   | 1.972(3)     | Co(11) – O(7)   | 1.980(4)     |
| Cr(4) – O(5)   | 1.948(4)     |                 |              |
| Cr(4) – O(112) | 2.050(3)     |                 |              |
| Cr(4) – O(171) | 1.970(4)     |                 |              |
| Cr(5) – O(1)   | 1.988(3)     |                 |              |
| Cr(5) – O(4)   | 1.965(3)     |                 |              |
| Cr(5) – O(6)   | 1.932(3)     |                 |              |

---

|                |          |                 |           |
|----------------|----------|-----------------|-----------|
| Cr(5) – O(7)   | 1.933(3) | Co(11) – O(17)  | 2.115(4)  |
| Cr(5) – O(113) | 2.040(3) | Co(11) – O(210) | 2.118(5)  |
| Cr(5) – O(180) | 1.976(3) | Co(11) – O(211) | 2.25(2)   |
| Co(6) – O(6)   | 1.982(3) | Co(12) – O(2)   | 2.210(3)  |
| Co(6) – O(14)  | 2.105(4) | Co(12) – O(10)  | 2.008(4)  |
| Co(6) – O(113) | 2.170(3) | Co(12) – O(12)  | 1.984(4)  |
| Co(6) – O(132) | 2.05(2)  | Co(12) – O(18)  | 2.095(4)  |
| Co(6) – O(135) | 2.27(2)  |                 |           |
| Co(6) – O(141) | 2.21(6)  | Co(12) – O(220) | 2.231(6)  |
| Co(6) – O(144) | 2.12(7)  | Co(12) – O(221) | 2.306(13) |
| Co(6) – O(181) | 2.044(3) | Co(12) – O(222) | 1.99(2)   |

---
